# Supplementary material for: Vegetables as biocatalysts in stereoselective hydrolysis of labile organic compounds
Source: Royal Society of Chemistry journal article supplement (doi:10.1039/b913936b), 2009-01-01

Supplementary information:

### Retention times Enantioselective GC CyclosilB

| <u>Compound</u>                     | <u>Temperature (°C)</u> | <u>Retention time (min)</u> |
|-------------------------------------|-------------------------|-----------------------------|
| (4 <i>R</i> ,5 <i>S</i> )-1         | 90                      | 28.0                        |
| (4 <i>S</i> ,5 <i>R</i> )-1         | 90                      | 29.7                        |
| (4 <i>R</i> ,5 <i>R</i> )-1         | 90                      | 30.7                        |
| (4 <i>S</i> ,5 <i>S</i> )-1         | 90                      | 35.7                        |
| (4 <i>R</i> ,5 <i>S</i> )-1 Acetate | 90                      | 35.2                        |
| (4 <i>S</i> ,5 <i>R</i> )-1 Acetate | 90                      | 36.8                        |
| (4 <i>R</i> ,5 <i>R</i> )-1 Acetate | 90                      | 37.8                        |
| (4 <i>S</i> ,5 <i>S</i> )-1 Acetate | 90                      | 39.1                        |
| ( <i>S</i> )-2                      | 92                      | 19.5                        |
| ( <i>R</i> )-2                      | 92                      | 20.4                        |
| ( <i>S</i> )-2 Acetate              | 92                      | 31.2                        |
| ( <i>R</i> )-2 Acetate              | 92                      | 32.9                        |
| (5 <i>S</i> ,6 <i>S</i> )-4         | 80                      | 58.6                        |
| (5 <i>R</i> ,6 <i>R</i> )-4         | 80                      | 60.3                        |
| (5 <i>R</i> ,6 <i>S</i> )-4         | 80                      | 64.5                        |
| (5 <i>S</i> ,6 <i>R</i> )-4         | 80                      | 65.3                        |
| (5 <i>S</i> ,6 <i>S</i> )-4 Acetate | 80                      | 71.7                        |
| (5 <i>R</i> ,6 <i>R</i> )-4 Acetate | 80                      | 76.1                        |
| (5 <i>R</i> ,6 <i>S</i> )-4 Acetate | 80                      | 69.3                        |
| (5 <i>S</i> ,6 <i>R</i> )-4 Acetate | 80                      | 73.3                        |

Due to the late elution of benzoates, they eluted in the area where bleeding of the enantioselective column was observed. Therefore the diastereomeric composition of the benzoate esters were determined by GC-MS on the achiral BPX-70 column.

**Chromatogram 5-hydroxy-4-methyl-3-heptanone and the acetate ester**  
 CyclosilB, 89°C

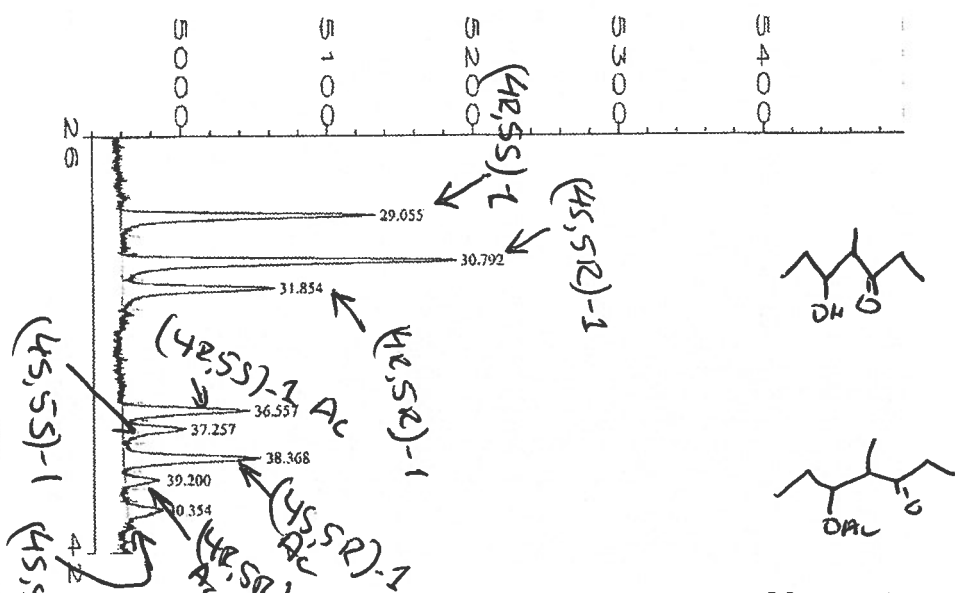

**Chromatogram 5-hydroxy-4-methyl-3-heptanone and benzoate**  
 GC-MS, BPX-70, 40°C(4),10/130(65),15/240(1).

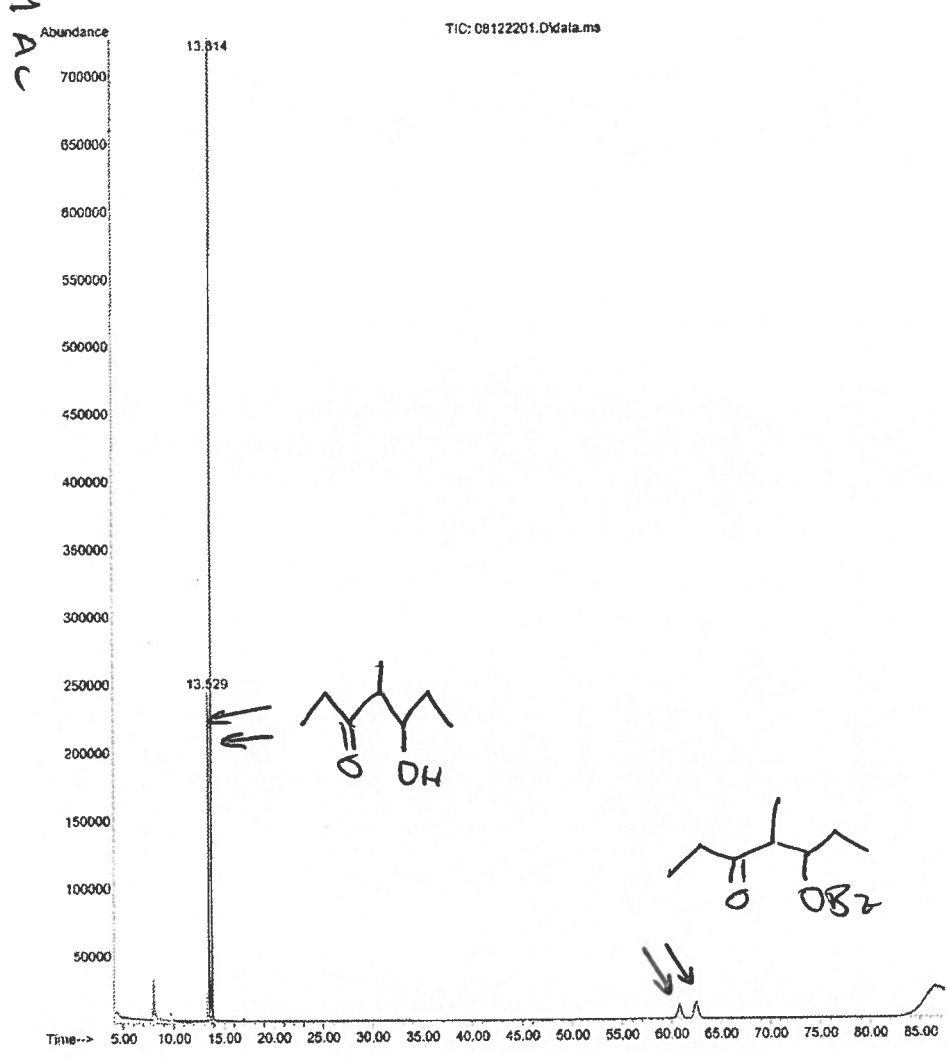

### Chromatogram 5-hydroxy-3-heptanone and acetate ester CyclosilB, 92°C

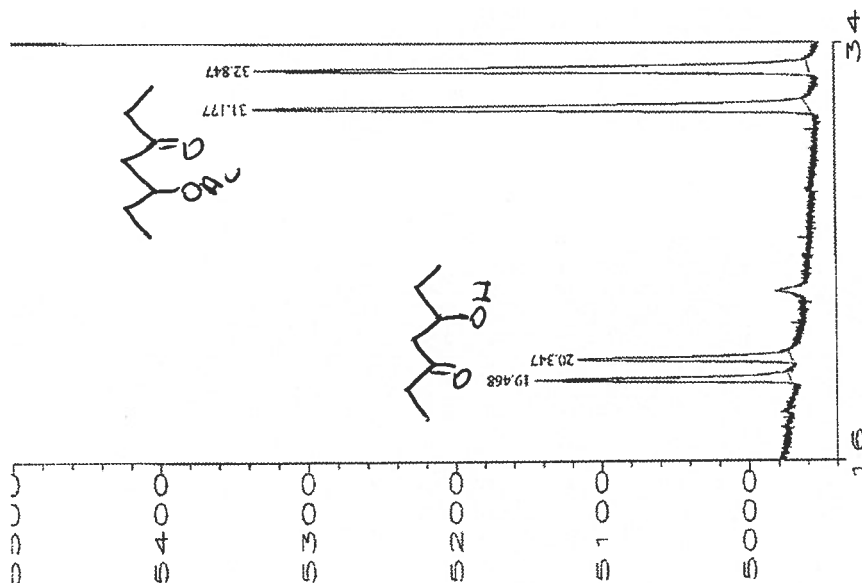

### Chromatogram of 5-hydroxy-3-heptanone and benzoate ester GC-MS, BPX-70, 40(4),10/155(40),15/250(1) (Peak at 8.96 min = 4-hepten-3-one, elimination product)

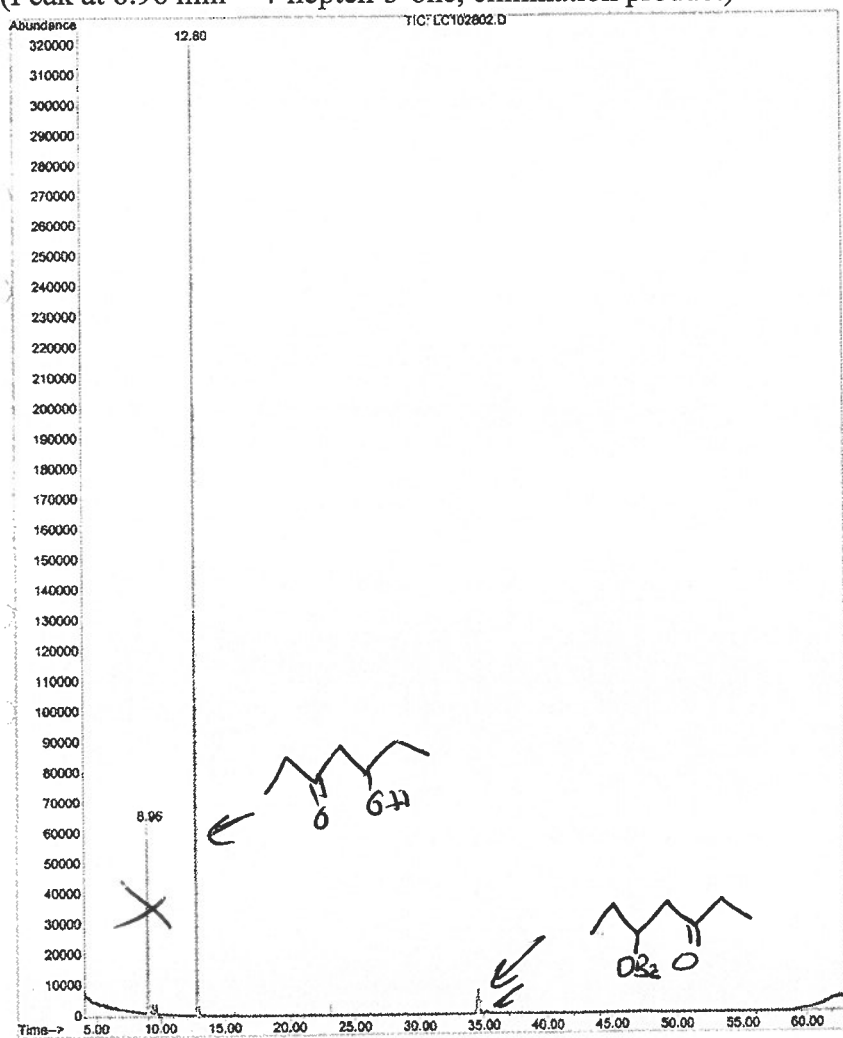

### Chromatogram 5-ethyl-6-hydroxy-4-octanone and acetate ester CyclosilB, 92°C

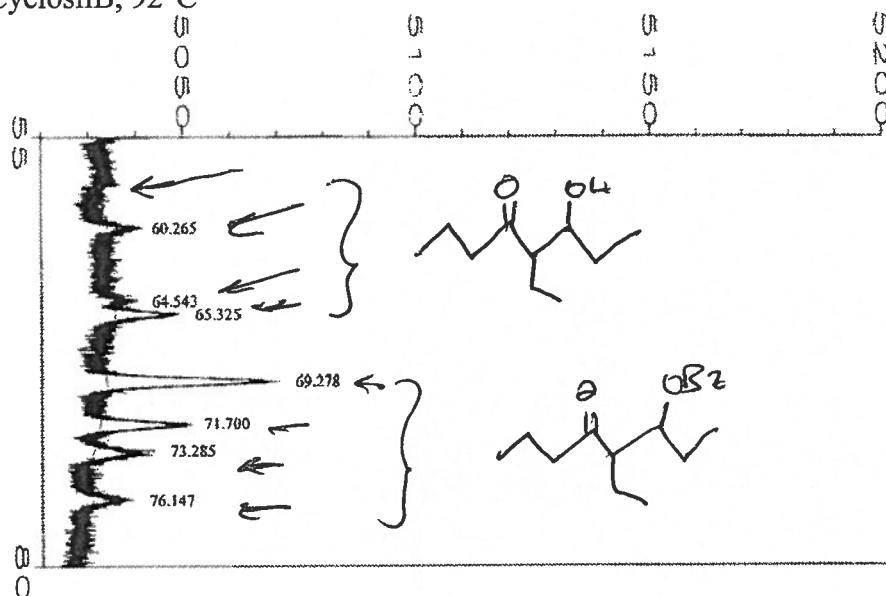

### Chromatogram of 5-ethyl-6-hydroxy-4-octanone and benzoate ester GC-MS, BPX-70, 40(4),10/160(15),15/250(1)

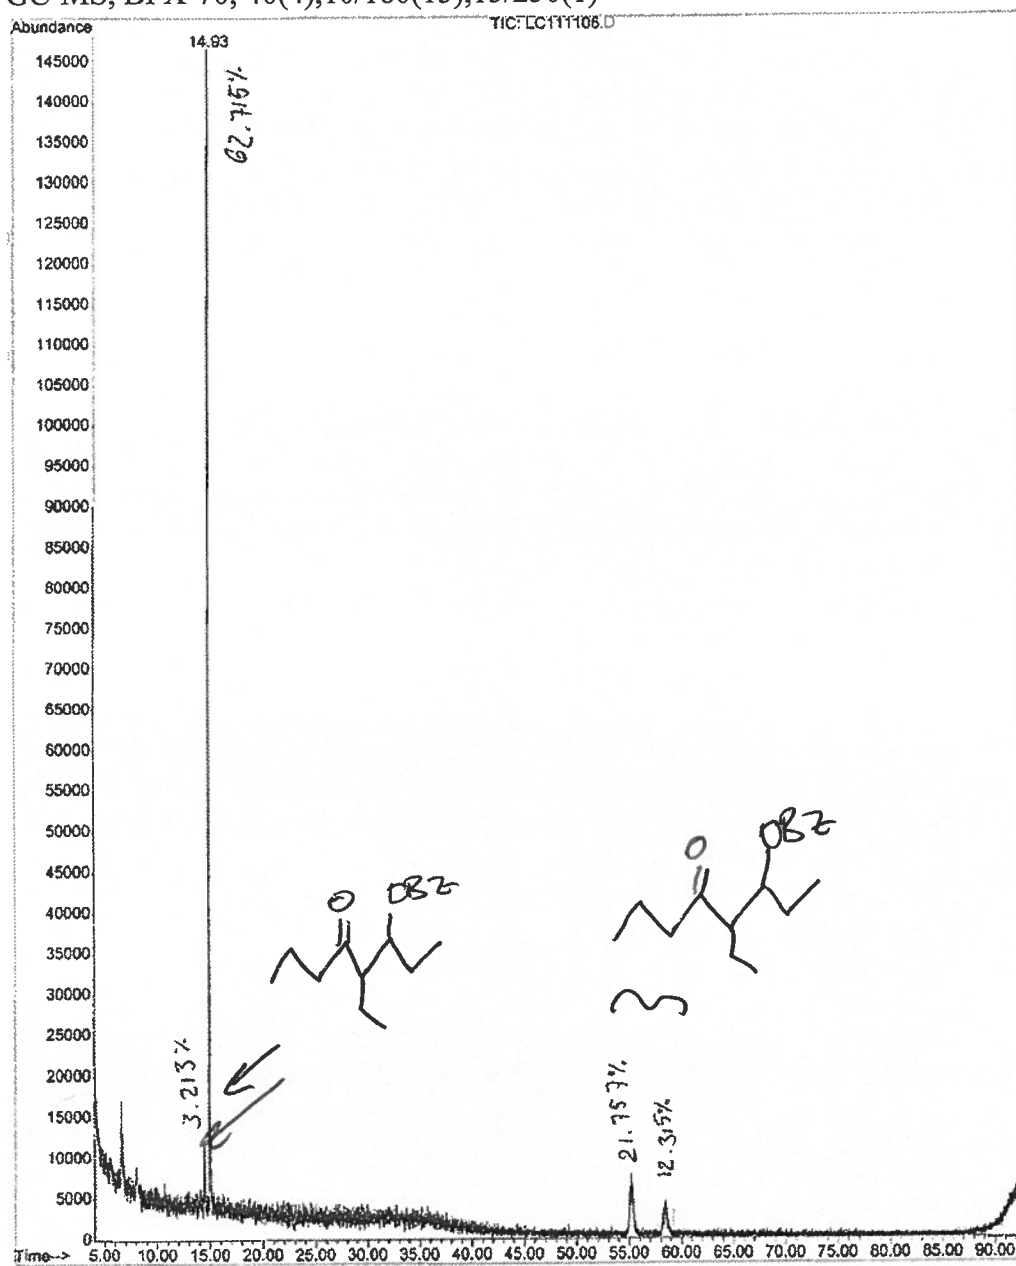

Supplement: 238_supplementary_mtrl.pdf [file 238_supplementary_mtrl.pdf]
